# Supplementary material for: Costs of people with diabetes in relation to average glucose control: an empirical approach controlling for year of onset cohorts
Source: Springer Nature journal article supplement (doi:10.1007/s10198-019-01072-z), 2019-05-16
Supplement: MOESM1 [file 16728832]

**APPENDIX**

Figure A1: Mean logarithm of care costs component (GP, hospital and specialist, drugs and devices costs) by diabetes duration and cohort


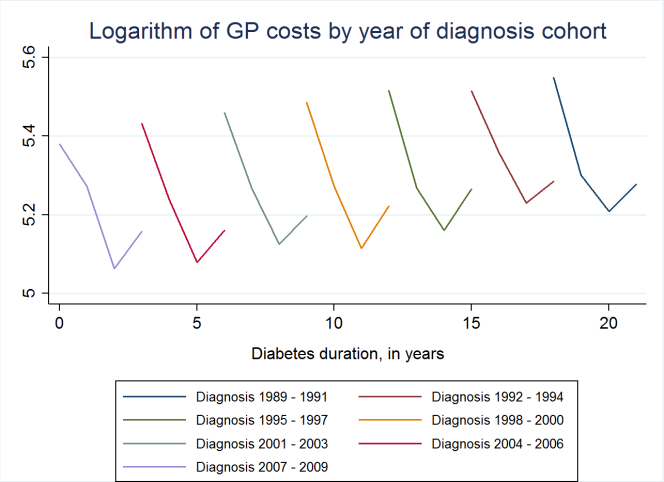

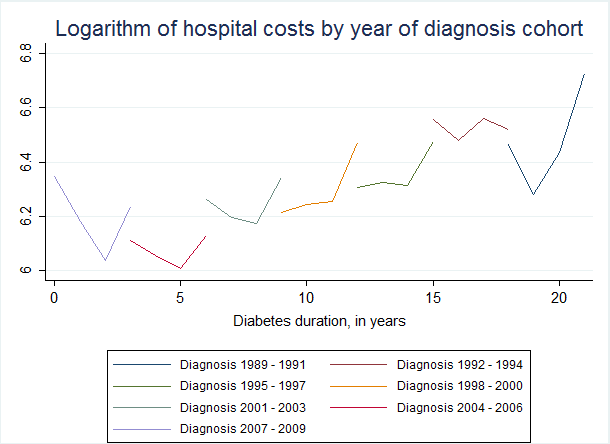


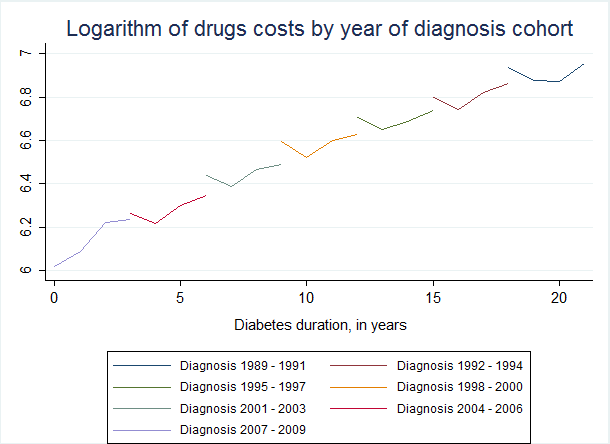

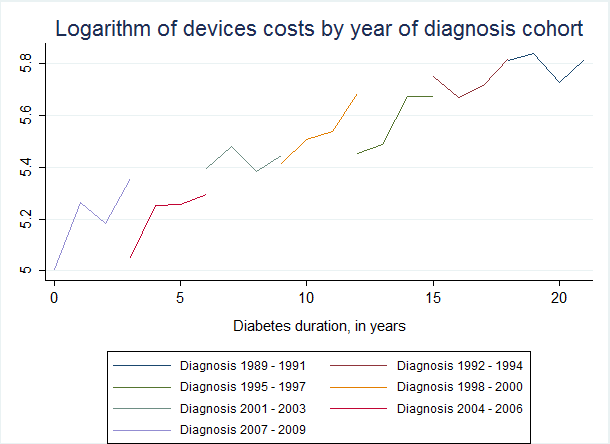

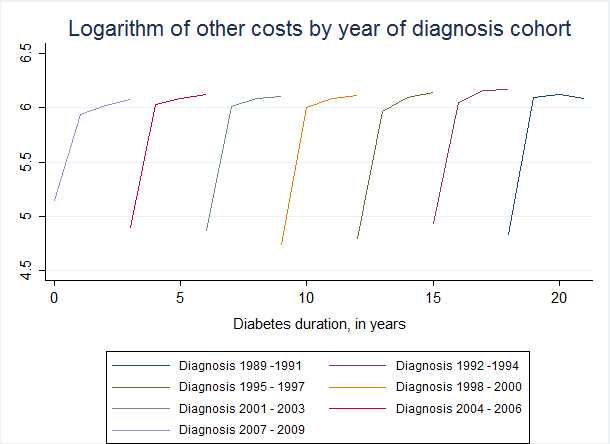


Table A1: Description of variables included in the analysis

| **Variables** | **Dataset of origin** | **Coding** | **Observations** |
| --- | --- | --- | --- |
| Total care costs (in 2010€) | VEKTIS dataset | Total care costs incurred by people with diabetes and reimbursed by the insurance | Time-variant. Costs were inflated or deflated, as appropriate, according to the Consumer Price Index (CPI) obtained from Statistics Netherlands. |
| GP cost (in 2010€) | VEKTIS dataset | Total costs incurred by people with diabetes when visiting their General Practitioner (GP) and reimbursed by the insurance | Time-variant. Costs were inflated or deflated, as appropriate, according to the CPI obtained from Statistics Netherlands. |
| Drugs cost (in 2010€) | VEKTIS dataset | Total drugs costs incurred by people with diabetes and reimbursed by the insurance | Time-variant. Costs were inflated or deflated, as appropriate, according to the CPI obtained from Statistics Netherlands. |
| Hospital cost (in 2010€) | VEKTIS dataset | Total hospitalization and specialist visits costs incurred by people with diabetes and reimbursed by the insurance | Time-variant. Costs were inflated or deflated, as appropriate, according to the CPI obtained from Statistics Netherlands. |
| Devices cost (in 2010€) | VEKTIS dataset | Total costs incurred by people with diabetes covering devices and other tools reimbursed by the insurance | Time-variant. Costs were inflated or deflated, as appropriate, according to the CPI obtained from Statistics Netherlands. |
| Other cost (in 2010€) | VEKTIS dataset | Total other costs (obstetrics, maternity, paramedical care, dentistry, hospital transport, mental care and abroad costs) incurred by people with diabetes and reimbursed by the insurance | Time-variant. Costs were inflated or deflated, as appropriate, according to the CPI obtained from Statistics Netherlands. |
| Female | VEKTIS dataset | 1: individual is a woman; 0: if man | Time-invariant. |
| Age (in years) | VEKTIS dataset | Age of the individual in each calendar year, in years | Time variant. Self-generated by subtracting the year of birth from the calendar year |
| Non-Caucasian ethnicity | ZODIAC dataset | 1: the individual ethnicity is non-Caucasian (Afro-Caribbean / Black or Asian-Indian); 0: if Caucasian ethnicity | Time-invariant |
| Socioeconomic Status (SES) | VEKTIS dataset | 1: the individual SES is low; 2: the individual SES is medium; 3: if high | Time-variant. Socioeconomic status by postcode and self-divided into three quintiles |
| Current smoker | ZODIAC dataset | 1: individual is currently smoking; 0: otherwise | Time invariant |
| Average glucose control | ZODIAC dataset | HbA1c, in % (mmol/mol) | Time-variant. Upper and lower bounds were applied[[1]](#footnote-1) |
| Diabetes duration | ZODIAC dataset | Time since diabetes diagnosis in each calendar year, in years | Time-invariant. Self-generated by subtracting the age at diagnosis diagnosis from current age |
| Year of diagnosis | ZODIAC dataset |  | Time-invariant. Self-generated by subtracting the diabetes duration from the calendar year |
| *Type of medication* |  |  |  |
| Oral medication | ZODIAC dataset | 1: individual has been told to take oral medication as diabetes treatment; 0: otherwise | Time-variant. A low proportion of the sample undergoes both diabetes treatments (oral medication and insulin) |
| Insulin | ZODIAC dataset | 1: individual has been told to use insulin as diabetes treatment; 0: otherwise | Time-variant. A low proportion of the sample undergoes both diabetes treatments (oral medication and insulin) |
| General Practitioner (GP) code | VEKTIS dataset | GP identification number | Time-variant |
| *Elixhauser comorbidities* |  |  |  |
| Cancer | ZODIAC dataset | 1: the individual has ever been diagnosed of cancer; 0: otherwise | Time-variant. Corresponding ICPC codes: A79, B72, B72.01, B72.02, B74, B75, D74, D75, D76, D77, D77.01, D77.02, D77.03, D77.04, D78, D78.01, F74, F74.01, F74.02, H75, H75.01, H75.02, I71, I71.01, I71.02, K71, K71.02, K72, K72.01, K72.02, L88, L88.01, L88.02, N74, N75, N76, R83.02, R84, R85, R86, S77, S77.01, S77.02, S77.03, S78, S79, S79.01, S80, S80.01, S81, T71, T72, T73, U75, U76, U77, U78, U79, X75, X76, X76.01, X77, X77.01, X77.02, X78, X78.01, X79, X80, X81, Y71.01, Y77, Y78, Y78.01, Y78.02, Y78.03, Y79 |
| Congestive heart failure | ZODIAC dataset | 1: the individual has ever been diagnosed of congestive heart failure; 0: otherwise | Time-variant. Corresponding ICPC codes: K77, K77.01, K77.02 |
| Acute myocardial infarction | ZODIAC dataset | 1: the individual has ever suffered an acute myocardial infarction; 0: otherwise | Time-variant. Corresponding ICPC codes: K75, K76.02 |
| Peripheral vascular disease | ZODIAC dataset | 1: the individual has ever been diagnosed of peripheral vascular disease; 0: otherwise | Time-variant. Correspondent ICPC codes: K92, K92.01, K92.02, K92.03, K92.04 |
| Hypertension, uncomplicated | ZODIAC dataset | 1: the individual has ever been diagnosed of uncomplicated hypertension; 0: otherwise | Time-variant. Corresponding ICPC codes: K86 |
| Hypertension, complicated | ZODIAC dataset | 1: the individual has ever been diagnosed of complicated hypertension; 0: otherwise | Time-variant. Corresponding ICPC codes: K87 |
| Alcohol abuse | ZODIAC dataset | 1: the individual has ever been diagnosed of alcohol abuse; 0: otherwise | Time-variant. Corresponding ICPC codes: P15, P15.01, P15.02, P15.03, P15.05, P15.06, P16 |
| Paralysis | ZODIAC dataset | 1: the individual has ever been diagnosed of paralysis; 0: otherwise | Time-variant. Corresponding ICPC codes: N18 |
| Stroke | ZODIAC dataset | 1: the individual has ever suffered an stroke | Time-variant. Corresponding ICPC codes: K90.03 |
|  |  |  |  |
| Any other cerebrovascular accident | ZODIAC dataset | 1: the individual has ever suffered any other cerebrovascular accident; 0: otherwise | Time-variant. Corresponding ICPC codes: K90, K90.01, K90.02 |
| Dementia | ZODIAC dataset | 1: the individual has ever been diagnosed of dementia; 0: otherwise | Time-variant. Corresponding ICPC codes: P70, P70.01, P70.02 |
| Chronic pulmonary disease | ZODIAC dataset | 1: the individual has ever been diagnosed of chronic pulmonary disease; 0: otherwise | Time-variant. Corresponding ICPC codes: R91, R91.01, R91.02, R95 |
| Retinopathy | ZODIAC dataset | 1: the individual has ever been diagnosed of retinopathy; 0: otherwise | Time-variant. Corresponding ICPC codes: F83, F83.01, F83.02 |
| Neuropathy | ZODIAC dataset | 1: the individual has ever been diagnosed of neuropathy; 0: otherwise | Time-variant. Corresponding ICPC codes: N94.02 |
| Hypothyroidism | ZODIAC dataset | 1: the individual has ever been diagnosed of hypothyroidism; 0: otherwise | Time-variant. Corresponding ICPC codes: T86 |
| Renal failure | ZODIAC dataset | 1: the individual has ever been diagnosed of renal failure; 0: otherwise | Time-variant. Corresponding ICPC codes: U99.01, T88 |
| Liver disease | ZODIAC dataset | 1: the individual has ever been diagnosed of liver disease; 0: otherwise | Time-variant. Corresponding ICPC codes: D72, D72.01, D72.02, D72.03, D96, D97, D97.04, D97.05 |
| Peptic ulcer | ZODIAC dataset | 1: the individual has ever been diagnosed of peptic ulcer; 0: otherwise | Time-variant. Corresponding ICPC codes: D85, D86, D86.01 |
| Rheumatoid arthritis | ZODIAC dataset | 1: the individual has ever been diagnosed of rheumatoid arthritis; 0: otherwise | Time-variant. Corresponding ICPC codes: K71.01, K71.01, K71.02, L88, L88.01, L88.02 |
| Weight loss | ZODIAC dataset | 1: the individual has ever suffered weight loss; 0: otherwise | Time-variant. Corresponding ICPC codes: T06, T06.01, T08 |
| Obesity | ZODIAC dataset | 1: the individual has ever been diagnosed of obesity; 0: otherwise | Time-variant. Corresponding ICPC codes: T82 |
| Anaemia | ZODIAC dataset | 1: the individual has ever been diagnosed of anaemia; 0: otherwise | Time-variant. Corresponding ICPC codes: B78, B78.01, B78.02, B78.03, B79, B80, B81, B81.01, B81.02, B82 |
| Psychosis | ZODIAC dataset | 1: the individual has ever been diagnosed of psychosis; 0: otherwise | Time-variant. Corresponding ICPC codes: P71, P72, P73, P73.02 |
| Depression | ZODIAC dataset | 1: the individual has ever been diagnosed of depression; 0: otherwise | Time-variant. Corresponding ICPC codes: P74, P74.01, P74.02, P75, P76, P76.01 |

Table A2: Results from the random-effects linear regression model with Mundlak terms on the logarithm of total care costs for the overall sample.

| VARIABLES | Coeff. Model 1 | Coeff. Model 2 | Coeff. Model 3 | Coeff. Model 4 | Coeff. Model 5 | Coeff. Model 6 | Coeff. Model 7 |
| --- | --- | --- | --- | --- | --- | --- | --- |
|  |  |  |  |  |  |  |  |
| Female | 0.057*** | 0.049** | 0.058*** | 0.059*** | 0.053*** | 0.052*** | 0.083*** |
|  | (0.020) | (0.020) | (0.020) | (0.020) | (0.020) | (0.020) | (0.019) |
| Age | 0.020** | 0.017* | 0.014 | 0.015 | 0.017* | 0.016 | 0.017* |
|  | (0.010) | (0.010) | (0.010) | (0.010) | (0.010) | (0.010) | (0.010) |
| Age2 | -0.00001 | 0.000003 | 0.00002 | 0.00001 | -0.000002 | -0.000005 | -0.00002 |
|  | (0.00007) | (0.00007) | (0.00007) | (0.00007) | (0.00007) | (0.00007) | (0.00007) |
| Non-Caucasian ethnicity | 0.019 | 0.039 | -0.012 | 0.002 | -0.051 | -0.045 | -0.088 |
| (0.203) | (0.207) | (0.207) | (0.206) | (0.179) | (0.180) | (0.199) |
| *Socioeconomic Status (SES) categories* |  |  |  |  |  |  |  |
| Medium SES | -0.028 | -0.030 | -0.024 | -0.023 | 0.029 | 0.032 | 0.016 |
|  | (0.052) | (0.052) | (0.051) | (0.051) | (0.055) | (0.055) | (0.055) |
| High SES | -0.038 | -0.033 | -0.023 | -0.023 | 0.046 | 0.052 | 0.023 |
|  | (0.099) | (0.100) | (0.098) | (0.098) | (0.103) | (0.103) | (0.103) |
| Current smoker | 0.055* | 0.053 | 0.036 | 0.036 | 0.030 | 0.030 | 0.017 |
|  | (0.029) | (0.029) | (0.028) | (0.029) | (0.029) | (0.028) | (0.028) |
| *Glycaemic control categories* |  |  |  |  |  |  |  |
| Fair control, HbA1c Є (7% - 8%] | 0.016 | 0.053 | 0.031 | 0.031 | 0.027 | 0.031 | 0.024 |
|  | (0.014) | (0.035) | (0.035) | (0.035) | (0.035) | (0.035) | (0.035) |
| Poor control, HbA1c >8% | 0.015 | 0.058 | 0.036 | 0.036 | 0.027 | 0.032 | 0.031 |
|  | (0.028) | (0.061) | (0.061) | (0.061) | (0.061) | (0.061) | (0.061) |
| *Glycaemic control # type of medication* |  |  |  |  |  |  |  |
| Target control # Oral medication |  | -0.034* | -0.010 | -0.009 | -0.016 | -0.015 | -0.015 |
|  |  | (0.019) | (0.019) | (0.019) | (0.019) | (0.019) | (0.019) |
| Fair control # Oral medication |  | -0.066** | -0.030 | -0.029 | -0.029 | -0.031 | -0.024 |
|  |  | (0.031) | (0.031) | (0.031) | (0.031) | (0.031) | (0.031) |
| Poor control # Oral medication |  | -0.064 | -0.031 | -0.031 | -0.026 | -0.030 | -0.032 |
|  |  | (0.057) | (0.056) | (0.056) | (0.057) | (0.057) | (0.056) |
| Target control # Insulin |  | 0.318*** | 0.292*** | 0.292*** | 0.292*** | 0.299*** | 0.297*** |
|  |  | (0.027) | (0.028) | (0.028) | (0.028) | (0.028) | (0.028) |
| Fair control # Insulin |  | 0.251*** | 0.239*** | 0.239*** | 0.236*** | 0.239*** | 0.240*** |
|  |  | (0.027) | (0.027) | (0.027) | (0.028) | (0.028) | (0.027) |
| Poor control # Insulin |  | 0.241*** | 0.230*** | 0.229*** | 0.225*** | 0.227*** | 0.232*** |
|  |  | (0.046) | (0.046) | (0.046) | (0.046) | (0.047) | (0.047) |
|  |  |  |  |  |  |  |  |
| Diabetes duration |  |  | 0.060*** | 0.059*** | 0.058*** | 0.064*** | 0.075*** |
|  |  |  | (0.005) | (0.006) | (0.006) | (0.006) | (0.006) |
| Diabetes duration2 |  |  | -0.0004*** | -0.0003 | -0.0004* | -0.0004* | -0.0004* |
|  |  |  | (0.0001) | (0.0002) | (0.0002) | (0.0002) | (0.0002) |
| *Year of onset categories* |  |  |  |  |  |  |  |
| Before 1989 |  |  |  | 0.028 | 0.049 | 0.047 | 0.079 |
|  |  |  |  | (0.214) | (0.216) | (0.215) | (0.210) |
| Year 1989 – 1991 |  |  |  | 0.018 | 0.026 | 0.022 | 0.057 |
|  |  |  |  | (0.175) | (0.176) | (0.175) | (0.172) |
| Year 1992 – 1994 |  |  |  | 0.077 | 0.052 | 0.048 | 0.067 |
|  |  |  |  | (0.149) | (0.151) | (0.150) | (0.147) |
| Year 1995 – 1997 |  |  |  | -0.032 | -0.029 | -0.031 | 0.003 |
|  |  |  |  | (0.125) | (0.125) | (0.125) | (0.122) |
| Year 1998 – 2000 |  |  |  | -0.012 | -0.015 | -0.015 | 0.008 |
|  |  |  |  | (0.099) | (0.099) | (0.099) | (0.097) |
| Year 2001 – 2003 |  |  |  | -0.005 | -0.009 | -0.009 | 0.010 |
|  |  |  |  | (0.072) | (0.072) | (0.072) | (0.071) |
| Year 2004 – 2006 |  |  |  | -0.055 | -0.041 | -0.040 | -0.024 |
|  |  |  |  | (0.048) | (0.048) | (0.048) | (0.046) |
| *Diabetes non-related comorbidities* |  |  |  |  |  |  |  |
| Cancer |  |  |  |  |  | 0.633*** | 0.642*** |
|  |  |  |  |  |  | (0.083) | (0.084) |
| Alcohol abuse |  |  |  |  |  | 0.302* | 0.306* |
|  |  |  |  |  |  | (0.161) | (0.159) |
| Paralysis |  |  |  |  |  | 0.013 | 0.042 |
|  |  |  |  |  |  | (0.041) | (0.043) |
| Chronic pulmonary disease |  |  |  |  |  | 0.190 | 0.161 |
|  |  |  |  |  |  | (0.134) | (0.139) |
| Hypothyroidism |  |  |  |  |  | 0.108 | 0.077 |
|  |  |  |  |  |  | (0.085) | (0.086) |
| Liver disease |  |  |  |  |  | 0.104 | 0.039 |
|  |  |  |  |  |  | (0.345) | (0.336) |
| Peptic ulcer |  |  |  |  |  | 0.025 | -0.112 |
|  |  |  |  |  |  | (0.184) | (0.241) |
| Rheumatoid arthritis |  |  |  |  |  | -0.397*** | -0.377*** |
|  |  |  |  |  |  | (0.140) | (0.142) |
| Anaemia |  |  |  |  |  | 0.185*** | 0.153** |
|  |  |  |  |  |  | (0.069) | (0.069) |
| Psychosis |  |  |  |  |  | 0.400* | 0.449** |
|  |  |  |  |  |  | (0.215) | (0.211) |
| Depression |  |  |  |  |  | 0.157** | 0.150** |
|  |  |  |  |  |  | (0.062) | (0.061) |
| *Diabetes-related comorbidities* |  |  |  |  |  |  |  |
| Congestive heart failure |  |  |  |  |  |  | 0.351*** |
|  |  |  |  |  |  |  | (0.065) |
| Acute myocardial infarction |  |  |  |  |  |  | 0.283*** |
|  |  |  |  |  |  |  | (0.067) |
| Peripheral vascular disease |  |  |  |  |  |  | 0.359*** |
|  |  |  |  |  |  |  | (0.075) |
| Hypertension, uncomplicated |  |  |  |  |  |  | -0.009 |
|  |  |  |  |  |  |  | (0.018) |
| Hypertension, complicated |  |  |  |  |  |  | 0.048 |
|  |  |  |  |  |  |  | (0.050) |
| Stroke |  |  |  |  |  |  | 0.247*** |
|  |  |  |  |  |  |  | (0.032) |
| Any other cerebrovascular accident |  |  |  |  |  |  | 0.329*** |
|  |  |  |  |  |  |  | (0.062) |
| Dementia |  |  |  |  |  |  | 0.147 |
|  |  |  |  |  |  |  | (0.141) |
| Retinopathy |  |  |  |  |  |  | 0.034 |
|  |  |  |  |  |  |  | (0.067) |
| Neuropathy |  |  |  |  |  |  | 0.126 |
|  |  |  |  |  |  |  | (0.081) |
| Renal failure |  |  |  |  |  |  | 0.016 |
|  |  |  |  |  |  |  | (0.049) |
| Weight loss |  |  |  |  |  |  | 0.564*** |
|  |  |  |  |  |  |  | (0.030) |
| Obesity |  |  |  |  |  |  | 0.079 |
|  |  |  |  |  |  |  | (0.068) |
| μi (SES categories) | -0.012 | -0.017 | -0.023 | -0.023 | -0.057 | -0.060 | -0.040 |
|  | (0.051) | (0.052) | (0.051) | (0.051) | (0.054) | (0.054) | (0.054) |
| μi (HbA1c categories) | 0.142*** | 0.067*** | 0.054** | 0.053** | 0.073*** | 0.071*** | 0.070*** |
|  | (0.025) | (0.025) | (0.025) | (0.025) | (0.026) | (0.025) | (0.025) |
| μi (diabetes duration) |  |  | -0.040*** | -0.044*** | -0.038*** | -0.044*** | -0.058*** |
|  |  |  | (0.005) | (0.011) | (0.012) | (0.011) | (0.012) |
| μi (acute myocardial infarction) |  |  |  |  |  |  | 1.105*** |
|  |  |  |  |  |  |  | (0.180) |
| μi (uncomplicated hypertension) |  |  |  |  |  |  | -0.080 |
|  |  |  |  |  |  |  | (0.083) |
| μi (renal failure) |  |  |  |  |  |  | 0.941*** |
|  |  |  |  |  |  |  | (0.182) |
| Constant | 6.248*** | 6.467*** | 6.591*** | 6.608*** | 6.401*** | 6.447*** | 6.395*** |
|  | (0.347) | (0.342) | (0.339) | (0.340) | (0.382) | (0.380) | (0.376) |
| N (Observations) | 22,612 | 22,612 | 22,612 | 22,612 | 22,612 | 22,612 | 22,612 |
| N (Individuals) | 5,653 | 5,653 | 5,653 | 5,653 | 5,653 | 5,653 | 5,653 |
| Year of diagnosis FE | NO | NO | NO | YES | YES | YES | YES |
| General Practitioner FE | NO | NO | NO | NO | YES | YES | YES |
| R-squared |  |  |  |  |  |  |  |
| Within | 0.019 | 0.005 | 0.015 | 0.015 | 0.024 | 0.028 | 0.036 |
| Between | 0.069 | 0.112 | 0.117 | 0.118 | 0.176 | 0.190 | 0.229 |
| Overall | 0.048 | 0.074 | 0.081 | 0.081 | 0.122 | 0.131 | 0.159 |
| σu | 0.666 | 0.640 | 0.640 | 0.640 | 0.631 | 0.614 | 0.588 |
| σe | 0.651 | 0.651 | 0.651 | 0.651 | 0.650 | 0.648 | 0.645 |
| Joint significance of Mundlak terms | 32.97*** | 7.43** | 66.46*** | 19.03*** | 19.53*** | 22.71*** | 100.56*** |
| Joint significance of new variables |  | 187.06*** | 155.72*** | 7.41 | 1.2e7*** | 86.82*** | 551.53*** |

Clustered standard errors at the individual level in parentheses. *** p<0.01, ** p<0.05, * p<0.1.

Reference categories: men, Caucasian ethnicity, low SES, no current smokers, target glycaemic level, year of diabetes onset 2007 - 2009.

Model 1 includes socioeconomic characteristics (gender, age, ethnicity, socioeconomic status), being a current smoker, glycaemic control categories and Mundlak terms for socioeconomic status categories and for glucose levels categories. Model 2 adds to Model 1 the interaction between glycaemic control categories and type of medication (oral medication or insulin), and Mundlak terms for socioeconomic status categories and for glucose levels categories also. Model 3 adds to Model 2 diabetes duration and its quadratic form, and Mundlak terms for socioeconomic status categories, glucose levels categories and for diabetes duration. Model 4 additionally includes to Model 3 the year of diabetes onset groups and the same Mundlak terms as in Model 3. Model 5 adds to Model 4 dummies for the General Practitioners (GPs) and the same Mundlak terms as in Model 4. Model 6 adds to Model 5 the diabetes non-related Elixhauser comorbidities and the same Mundlak terms as in Model 5. Model 7 additionally includes the diabetes-related Elixhauser comorbidities and the Mundlak terms for socioeconomic status and glucose level categories, diabetes duration and for uncomplicated hypertension, renal failure and acute myocardial infarction.

Table A3: Summary statistics for the original linked sample before dropping observations and after removing duplicated cases.

| **Variables** | **Whole sample** | **HbA1c ≤ 6.5%** | **6.5% < HbA1c ≤ 7.5%2** | **HbA1c > 7.5%2** |
| --- | --- | --- | --- | --- |
| Mean ± SD (N) | Mean ± SD (N) | Mean ± SD (N) | Mean ± SD (N) |
|  |  |  |  |  |
| Total care costs (in 2010€) | 4,218.99 ± 7,352.71 (168,714) | 4,100.69 ± 7,070.69 (61,320) | 4,219.92 ± 6,916.30 (47,475) | 4,339.31 ± 7,945.75 (59,919) |
| Logarithm of total care costs | 7.70 ± 1.10 (168,618) | 7.70 ± 1.01 (61,291) | 7.78 ± 1.00 (47,461) | 7.64 ± 1.21 (59,866) |
| *Types of costs (in 2010€)* |  |  |  |  |
| GP cost | 218.73 ± 143.17 (168,714) | 218.48 ± 139.62 (61,320) | 222.40 ± 140.70 (47,475) | 216.07 ± 148.54 (59,919) |
| Drugs cost | 904.96 ± 1,821.74 (168,714) | 839.85 ± 1,790.24 (61,320) | 946.90 ± 1,815.61 (47,475) | 938.38 ± 1,856.38 (59,919) |
| Hospitalization cost | 2,230.75 ± 5,657.54 (168,714) | 2,196.38 ± 5,458.55 (61,320) | 2,193.97 ± 5,485.84 (47,475) | 2,295.07 ± 5,981.82 (59,919) |
| Devices cost | 245.91 ± 709.80 (168,714) | 213.21 ± 716.67 (61,320) | 267.21 ± 701.94 (47,475) | 262.50 ± 707.73 (59,919) |
| Other cost | 535.72 ± 2,873.6 (168,714) | 561.43 ± 2,790.00 (61,320) | 516.85 ± 2,194.73 (47,475) | 524.36 ± 3,386.37 (59,919) |
| Female | 0.51 (168,714) | 0.51 (61,320) | 0.52 (47,475) | 0.50 (59,919) |
| Age (in years) | 66.47 ± 11.78 (168,714) | 67.12 ± 11.21 (61,320) | 67.48 ± 11.44 (47,475) | 65.02 ± 12.45 (59,919) |
| Non-Caucasian ethnicity | 0.002 (168,714) | 0.0008 (61,320) | 0.002 (47,475) | 0.002 (59,919) |
| *Socioeconomic Status (SES)* |  |  |  |  |
| Low | 0.33 (168,714) | 0.33 (61,320) | 0.33 (47,475) | 0.35 (59,919) |
| Medium | 0.34 (168,714) | 0.34 (61,320) | 0.34 (47,475) | 0.33 (59,919) |
| High | 0.33 (168,714) | 0.23 (61,320) | 0.33 (47,475) | 0.32 (59,919) |
| Current smoker | 0.16 (154,017) | 0.16 (56,948) | 0.15 (44,182) | 0.18 (52,887) |
| HbA1c (in %, mmol/mol) | 6.79 ± 5.48 (124,831) | 6.09 ± 0.35 (61,320) | 6.97 ± 0.28 (47,475) | 8.90 ± 15.06 (16,036) |
| Diabetes duration (in years) | 7.21 ± 28.14 (166,725) | 6.14 ± 21.67 (60,831) | 7.74 ± 22.90 (47,130) | 7.90 ± 36.58 (58,764) |
| *Type of medication* |  |  |  |  |
| No medication | 0.29 (144,536) | 0.19 (47,409) | 0.09 (44,992) | 0.78 (52,118) |
| Oral medication | 0.61 (144,572) | 0.78 (47,414) | 0.80 (45,109) | 0.29 (52,139) |
| Insulin | 0.11 (144,669) | 0.06 (47,438) | 0.16 (45,064) | 0.11 (52,167) |

Table A4: Descriptive statistics on the prevalence of the Elixhauser comorbidities for the whole sample and by glycaemic control.

| **Variables** | **Whole sample (N = 22,612)** | **HbA1c ≤ 6.5% (N = 9,845)** | **6.5% < HbA1c ≤ 7.5% (N = 9,779)** | **HbA1c > 7.5% (N = 2,988)** | **Comparison of means** |
| --- | --- | --- | --- | --- | --- |
| Mean | Mean | Mean | Mean | p-value |
| *Elixhauser comorbidities* |  |  |  |  |  |
| Cancer | 0.009 | 0.009 | 0.009 | 0.010 | 0.512 |
| Congestive heart failure | 0.009 | 0.008 | 0.010 | 0.011 | 0.060* |
| Acute myocardial infarction | 0.014 | 0.013 | 0.014 | 0.014 | 0.624 |
| Peripheral vascular disease | 0.007 | 0.008 | 0.008 | 0.006 | 0.429 |
| Hypertension, uncomplicated | 0.107 | 0.109 | 0.110 | 0.093 | 0.033** |
| Hypertension, complicated | 0.013 | 0.012 | 0.013 | 0.013 | 0.669 |
| Alcohol abuse | 0.001 | 0.002 | 0.001 | 0.002 | 0.811 |
| Paralysis | 0.00004 | 0.0001 | 0.000 | 0.000 | 0.317 |
| Stroke | 0.09 | 0.082 | 0.092 | 0.10 | 0.041** |
| Any other cerebrovascular accident | 0.01 | 0.011 | 0.009 | 0.009 | 0.225 |
| Dementia | 0.002 | 0.001 | 0.002 | 0.002 | 0.649 |
| Chronic pulmonary disease | 0.002 | 0.002 | 0.002 | 0.002 | 0.814 |
| Retinopathy | 0.005 | 0.003 | 0.006 | 0.007 | 0.005*** |
| Neuropathy | 0.004 | 0.004 | 0.004 | 0.004 | 0.512 |
| Hypothyroidism | 0.004 | 0.003 | 0.004 | 0.003 | 0.803 |
| Renal failure | 0.01 | 0.014 | 0.014 | 0.015 | 0.817 |
| Liver disease | 0.0004 | 0.0004 | 0.0005 | 0.000 | 0.412 |
| Peptic ulcer | 0.0004 | 0.0005 | 0.0003 | 0.000 | 0.117 |
| Rheumatoid arthritis | 0.002 | 0.001 | 0.002 | 0.003 | 0.159 |
| Weight loss | 0.00004 | 0.0001 | 0.000 | 0.000 | 0.317 |
| Obesity | 0.007 | 0.005 | 0.007 | 0.009 | 0.022** |
| Anaemia | 0.004 | 0.005 | 0.003 | 0.007 | 0.627 |
| Psychosis | 0.0004 | 0.0005 | 0.0004 | 0.0003 | 0.544 |
| Depression | 0.008 | 0.008 | 0.008 | 0.009 | 0.665 |

Means are expressed as percentages.

*** p<0.01; ** p<0.05; * p < 0.1. Standard errors were clustered at the individual level.

Table A5: Results from the random-effects linear regression model on the logarithm of total care costs

| VARIABLES | Coeff. Model 6 | Coeff. Model 7 |
| --- | --- | --- |
| Female | 0.0500** | 0.0639*** |
|  | (0.0197) | (0.0194) |
| Age | 0.0117 | 0.0108 |
|  | (0.00982) | (0.00973) |
| Age2 | 3.37e-05 | 2.87e-05 |
|  | (7.16e-05) | (7.10e-05) |
| Non-Caucasian ethnicity | -0.0377 | -0.0381 |
| (0.174) | (0.173) |
| *Socioeconomic Status (SES) categories* |  |  |
| Low SES | 0.0583* | 0.0560* |
|  | (0.0335) | (0.0329) |
| Medium SES | 0.0339 | 0.0301 |
|  | (0.0349) | (0.0341) |
| Current smoker | 0.0303 | 0.0209 |
|  | (0.0285) | (0.0280) |
| HbA1c, in % (mmol/mol) | 0.0153 | 0.0130 |
|  | (0.0193) | (0.0192) |
| *Type of medication* |  |  |
| Oral medication | 0.0516 | 0.0555 |
|  | (0.133) | (0.133) |
| Insulin | 0.606*** | 0.556*** |
|  | (0.146) | (0.144) |
| *Glycaemic level # type of medication* |  |  |
| HbA1c # Oral medication | -0.0108 | -0.0114 |
|  | (0.0196) | (0.0195) |
| HbA1c # Insulin | -0.0454** | -0.0380* |
|  | (0.0198) | (0.0196) |
| Diabetes duration | 0.0660*** | 0.0758*** |
|  | (0.00602) | (0.00650) |
| Diabetes duration2 | -0.000996*** | -0.00114*** |
|  | (0.000162) | (0.000165) |
| *Year of onset categories* |  |  |
| Before 1989 | -0.665*** | -0.818*** |
|  | (0.126) | (0.129) |
| Year 1989 – 1991 | -0.556*** | -0.679*** |
|  | (0.0930) | (0.0972) |
| Year 1992 – 1994 | -0.444*** | -0.560*** |
|  | (0.0817) | (0.0861) |
| Year 1995 – 1997 | -0.434*** | -0.518*** |
|  | (0.0674) | (0.0698) |
| Year 1998 – 2000 | -0.328*** | -0.390*** |
|  | (0.0557) | (0.0576) |
| Year 2001 – 2003 | -0.217*** | -0.262*** |
|  | (0.0469) | (0.0478) |
| Year 2004 – 2006 | -0.139*** | -0.154*** |
|  | (0.0405) | (0.0402) |
| *Diabetes non-related comorbidities* |  |  |
| Cancer | 0.629*** | 0.638*** |
|  | (0.0830) | (0.0841) |
| Alcohol abuse | 0.300* | 0.301* |
|  | (0.161) | (0.159) |
| Paralysis | 0.0170 | 0.0650 |
|  | (0.0444) | (0.0481) |
| Chronic pulmonary disease | 0.177 | 0.144 |
|  | (0.135) | (0.139) |
| Hypothyroidism | 0.0948 | 0.0604 |
|  | (0.0848) | (0.0857) |
| Liver disease | 0.105 | 0.0356 |
|  | (0.346) | (0.336) |
| Peptic ulcer | 0.0195 | -0.108 |
|  | (0.183) | (0.240) |
| Rheumatoid arthritis | -0.396*** | -0.379*** |
|  | (0.141) | (0.142) |
| Anaemia | 0.180*** | 0.149** |
|  | (0.0687) | (0.0684) |
| Psychosis | 0.393* | 0.433** |
|  | (0.216) | (0.213) |
| Depression | 0.151** | 0.144** |
|  | (0.0624) | (0.0614) |
| *Diabetes-related comorbidities* |  |  |
| Congestive heart failure |  | 0.354*** |
|  |  | (0.0656) |
| Acute myocardial infarction |  | 0.349*** |
|  |  | (0.0644) |
| Peripheral vascular disease |  | 0.355*** |
|  |  | (0.0757) |
| Hypertension, uncomplicated |  | -0.0290* |
|  |  | (0.0173) |
| Hypertension, complicated |  | 0.0363 |
|  |  | (0.0503) |
| Stroke |  | 0.250*** |
|  |  | (0.0322) |
| Any other cerebrovascular accident |  | 0.322*** |
|  |  | (0.0619) |
| Dementia |  | 0.159 |
|  |  | (0.143) |
| Retinopathy |  | 0.0272 |
|  |  | (0.0672) |
| Neuropathy |  | 0.125 |
|  |  | (0.0813) |
| Renal failure |  | 0.0671 |
|  |  | (0.0480) |
| Weight loss |  | 0.563*** |
|  |  | (0.0295) |
| Obesity |  | 0.0765 |
|  |  | (0.0678) |
| Constant | 6.367*** | 6.382*** |
|  | (0.398) | (0.396) |
| N (Observations) | 22,612 | 22,612 |
| N (Individuals) | 5,653 | 5,653 |
| General Practitioner FE | YES | YES |
| R-squared |  |  |
| Within | 0.027 | 0.035 |
| Between | 0.187 | 0.217 |
| Overall | 0.130 | 0.151 |
| σu | 0.613 | 0.587 |
| σe | 0.648 | 0.645 |
| Joint significance of new variables (χ2) | 83.87*** | 578.97*** |

Clustered standard errors at the individual level in parentheses. *** p<0.01, ** p<0.05, * p<0.1.

Reference categories: men, Caucasian ethnicity, high SES, no current smokers, no medication, year of diabetes onset 2007 - 2009.

Model 6 adds to Model 5 the diabetes non-related Elixhauser comorbidities. Model 7 additionally includes the diabetes-related Elixhauser comorbidities.

1. Extreme values were deleted according to the KCK DS Extreme Values report from 2016 [↑](#footnote-ref-1)
